# Supplementary material
Source: PubMed Central journal article supplement (PMC6415677)
Supplement: NIHMS1519646-supplement-Author_Information_File_2.pdf [file NIHMS1519646-supplement-Author_Information_File_2.pdf]

January 11, 2019

Brahmajee K. Nallamothe, MD, MPH  
Editor-in-Chief  
Circulation: Cardiovascular Quality and Outcomes  
200 Fifth Avenue  
Suite 1020  
Waltham, MA, 02451

RE: Authorship change for CIRCCQO/2018/004741R2

Dear Dr. Nallamothe,

As an original author on the paper "Predicting future cardiovascular events in patients with peripheral artery disease using electronic health record data", I am in agreement with the addition of Kenneth Jung, Phd as a co-author.

Sincerely,

A handwritten signature in black ink, appearing to read "Li Li".

Li Li  
Assistant Professor  
Genetics and Genomic Sciences Dept.  
The Institute for Next Generation of Healthcare  
Icahn School of Medicine at Mount Sinai  
770 Lexington Ave., Rm 1511  
New York, NY 10065
