# Supplementary material
Source: PubMed Central journal article supplement (PMC6415677)
Supplement: NIHMS1519646-supplement-Author_Information_File_5.pdf [file NIHMS1519646-supplement-Author_Information_File_5.pdf]

Nigam H. Shah, MBBS, PhD  
Associate Professor of Medicine  
Center for Biomedical Informatics Research  
Stanford University

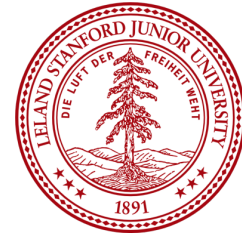

January 11, 2019

Brahmajee K. Nallamothe, MD, MPH  
Editor-in-Chief, Circulation: Cardiovascular Quality and Outcomes  
200 Fifth Avenue  
Suite 1020  
Waltham, MA, 02451

RE: Authorship change for CIRCCQO/2018/004741R2

Dear Dr. Nallamothe,

As an original author on the paper "Predicting future cardiovascular events in patients with peripheral artery disease using electronic health record data", I am in agreement with the addition of Kenneth Jung, Phd as a co-author.

Sincerely,

A handwritten signature in black ink that reads 'N.H. Shah' with a horizontal line underneath.

Nigam H. Shah  
Email: [nigam@stanford.edu](mailto:nigam@stanford.edu)
